1

2 **Maternal age alters offspring lifespan, fitness, and lifespan extension under caloric**  
3 **restriction**

4

5 Martha J. Bock<sup>1,2‡</sup>, George C. Jarvis<sup>1,3‡</sup>, Emily L. Corey<sup>1</sup>, Emily E. Stone<sup>1</sup>, and Kristin E.  
6 Gribble<sup>1\*</sup>

7

8 <sup>1</sup>Marine Biological Laboratory, Woods Hole, MA, USA 02543

9 <sup>2</sup>Mayo Clinic, Rochester, MN, USA 55905

10 <sup>3</sup>California State University, Northridge, Northridge, CA, USA 91330

11 ‡These authors contributed equally to this work

12

13

14 \*Corresponding author: [kgribble@mbi.edu](mailto:kgribble@mbi.edu)

15

16

17

18 **ABSTRACT**

19 Maternal age has a negative effect on offspring lifespan in a range of taxa and is hypothesized  
20 to influence the evolution of aging. However, the mechanisms of maternal age effects are  
21 unknown, and it remains unclear if maternal age alters offspring response to therapeutic  
22 interventions to aging. Here, we evaluate maternal age effects on offspring lifespan,  
23 reproduction, and the response to caloric restriction, and investigate maternal investment as a  
24 source of maternal age effects using the rotifer, *Brachionus manjavacas*, an aquatic invertebrate.  
25 We found that offspring lifespan and fecundity decline with increasing maternal age. Caloric  
26 restriction increases lifespan in all offspring, but the magnitude of lifespan extension is greater in  
27 the offspring from older mothers. The trade-off between reproduction and lifespan extension  
28 under low food conditions expected by life history theory is observed in young-mother offspring,  
29 but not in old-mother offspring. Age-related changes in maternal resource allocation to  
30 reproduction do not drive changes in offspring fitness or plasticity under caloric restriction in *B.*  
31 *manjavacas*. Our results suggest that the declines in reproduction in old-mother offspring negate  
32 the evolutionary fitness benefits of lifespan extension under caloric restriction.

33

34 **KEYWORDS**

35 Maternal effects; aging; caloric restriction; evolutionary fitness; maternal investment

36

37

## 38 INTRODUCTION

39 Maternal effects occur when the environment or physiological state of a mother changes the  
40 phenotype of her offspring without a corresponding change in genotype. Offspring phenotype  
41 may be modified in response to maternal environmental factors including diet, temperature, or  
42 exposure to stressors<sup>1-11</sup>. Such maternal effects may be adaptive as in *Daphnia* and rotifers, in  
43 which offspring hatch with protective spines upon maternal exposure to predators<sup>2-6,12</sup>, or as in  
44 plants, in which offspring have higher rates of germination and survival when planted in the  
45 same high-light or low-light environment as their parent<sup>7,8</sup>. Alternatively, maternal effects may  
46 be detrimental as is the case in the negative health outcomes for children due to excessive  
47 maternal smoking or alcohol consumption during pregnancy<sup>13-15</sup>. We are beginning to  
48 understand that maternal effects may be mediated by a variety of epigenetic mechanisms,  
49 including direct transmission of maternal proteins, mRNA, lncRNA, miRNA, and modifications to  
50 DNA and histones<sup>16-20</sup>. While maternal effects have long been studied and are well known in  
51 the ecological literature, there has been a recent rise in interest in maternal effects in the context  
52 of human health and aging<sup>21</sup>.

53

54 Maternal age, or the age of a mother at the time her offspring are born, has been shown to have  
55 a negative effect on offspring health in a range of taxa<sup>22-32</sup>. A decrease in offspring lifespan with  
56 increasing maternal age was first demonstrated in rotifers--microscopic, aquatic invertebrate  
57 animals--and has come to be known as the "Lansing Effect"<sup>23,24,33</sup>. Declines in offspring health,  
58 lifespan, and stress resistance with increasing maternal age have since been demonstrated  
59 across taxa, ranging from invertebrates like soil mites and *Drosophila*, to mammals including  
60 mice and humans<sup>26,27,29-32,34-36</sup>. The mechanisms of these maternal age effects are unclear, and  
61 have variously been attributed to increases or decreases in maternal investment in reproduction  
62 with increasing maternal age, as well as to other, as yet undefined, epigenetic factors<sup>37-44</sup>.

63

64 Epidemiological and demographic studies in humans have shown a negative correlation  
65 between maternal age and children's lifespan and health<sup>25,27,30,45,46</sup>. However, maternal age  
66 effects in humans can be difficult to separate from confounding environmental factors including  
67 paternal age effects, parental health, parental socio-economic status, and parental care<sup>47-49</sup>.  
68 Additionally, in human studies, both genotype and environment are usually uncharacterized, and  
69 it is impossible to systematically and simultaneously vary maternal age and offspring  
70 environment for a given genotype. Given these challenges, appropriate animal models must be  
71 used to characterize the drivers and outcomes of maternal age effects on offspring fitness in  
72 varied environments.

73

74 Maternal effects result in different outcomes in diverse offspring environments. For example,  
75 maternal effects may be detrimental as in the Barker Hypothesis, where fetal undernutrition  
76 reprograms offspring to have a more efficient metabolism. This maternal effect is adaptive in low  
77 nutrient environments (the "thrifty phenotype"), but becomes maladaptive when children mature  
78 in high food environments, leading to adult metabolic and cardiac disease<sup>9-11</sup>. Thus, maternal  
79 age may modulate the effectiveness of anti-aging lifestyle or medical interventions in offspring in  
80 unforeseen ways. While there has been some investigation of how genetic background may  
81 affect the response to lifespan-extending interventions such as caloric restriction, gene  
82 knockdown, or pharmaceuticals<sup>50-53</sup>, little is known about how maternal age may influence  
83 offspring response to these therapies, or if such interventions might rescue offspring from the  
84 negative effects of maternal age.

85

86 Caloric restriction—a decrease in food consumption—has been shown to extend lifespan across  
87 a range of taxa and is heavily studied as a therapeutic intervention to aging<sup>50,54-58</sup>. Evolutionary

88 life history theory and the related Disposable Soma theory of aging both hypothesize that under  
89 the low food conditions of caloric restriction, an individual re-allocates resources from  
90 reproduction and dedicates them to preservation of the body, or soma<sup>55,59-62</sup>. Although it is  
91 known that maternal age affects offspring phenotype, current evolutionary theories of aging and  
92 caloric restriction do not incorporate maternal age as a variable, and thus do not describe or  
93 predict changes in the direction or magnitude of lifespan and reproductive trade-offs due to  
94 maternal age<sup>60,62-65</sup>. Given the emphasis on caloric restriction and caloric restriction mimetics as  
95 interventions to increase lifespan and improve late-age health, it is critical to understand sources  
96 of variability such as maternal age in the lifespan and health responses to these therapies.

97  
98 The influence of maternal age on offspring evolutionary fitness and on the evolution of aging  
99 remains poorly understood<sup>29,66-68</sup>. Offspring lifespan is often measured in studies of maternal  
100 age effects, but is only one component of evolutionary fitness. To understand what drives the  
101 evolution of aging and the response to therapies, we must consider the combination of factors  
102 that contribute to fitness, including lifespan, reproduction, and resistance to external mortality as  
103 age-specific rather than as end-point traits like median lifespan and lifetime reproduction trade-  
104 offs.

105  
106 In this study, we used the monogonont rotifer, *Brachionus manjavacas*, to investigate the effect  
107 of maternal age on offspring lifespan and fitness under fully fed and anti-aging caloric restriction  
108 diets. With a short lifespan of two weeks and simple laboratory culture, rotifers are similar to  
109 other tractable invertebrate model systems relevant to human health<sup>69,70</sup>. In addition, rotifers  
110 provide a number of unique benefits as a model system for aging and maternal effects.

111 *Brachionus manjavacas*, like humans, makes a relatively large investment in individual offspring,  
112 as evidenced by the low numbers of offspring produced over the two-week lifespan (25 – 30

113 offspring) and large egg size (30 – 50 % of adult body size). In contrast, other invertebrates,  
114 such as *C. elegans* and *Drosophila*, produce hundreds to thousands of small eggs per individual.  
115 Additionally, reproduction in *B. manjavacas* is continuous and sequential throughout the  
116 reproductive period, unlike in *C. elegans*, *Drosophila*, or *Daphnia*, which produce hundreds of  
117 eggs over just a few days or in clutches<sup>71-74</sup>. In these ways, the reproductive strategy of *B.*  
118 *manjavacas* is akin to that of K-selected species like humans, rather than to r-selected species  
119 like *C. elegans*, *Drosophila*, or *Daphnia*<sup>75</sup>. Such differences in reproductive strategies are likely  
120 to influence maternal effects on offspring. Monogonont rotifers exhibit no post-hatching parental  
121 care, avoiding the confounding effects of changes in maternal care with increasing age. Similar  
122 to humans, rotifers have direct development, with no larval stage or metamorphosis.

123

124 To eliminate confounding variability introduced by paternal effects, mother-offspring conflict,  
125 genetic recombination, and genotype diversity, we used a clonal, asexual female lineage of *B.*  
126 *manjavacas*. *Brachionus* spp. generally reproduce asexually, with females producing isogenic  
127 offspring via mitosis in the germline. In response to environmental conditions like crowding,  
128 some females become sexual and produce haploid male offspring that mate with other sexual  
129 females. Asexual females and their offspring were used in all experiments except for some  
130 measures of maternal investment, for which we examined meiotically-produced eggs that hatch  
131 into males. All offspring were from the same group of mothers, not from different cohorts for  
132 each maternal age as in many other studies of maternal effects; the F1 maternal age and diet  
133 cohorts were genetically-identical and composed of sets of siblings<sup>29</sup>. All observations were  
134 made on individuals, not populations or groups of rotifers, and thus we can directly correlate  
135 lifespans and fecundities of individual mothers and their daughters, allowing examination of  
136 possible individual heritability of lifespan.

137

138 Because maternal environment and physiology are known to affect offspring phenotype, and  
139 because maternal age is known to influence offspring lifespan, we hypothesized that maternal  
140 age may affect offspring adaptive response to caloric restriction. This study expands upon our  
141 prior work demonstrating that maternal caloric restriction increases offspring lifespan and  
142 reproduction, especially in late maternal age offspring<sup>76</sup>. In the current study, we investigated  
143 the combined effect of maternal age and offspring diet to determine (1) whether changes in  
144 gross maternal reproductive investment with increasing maternal age are correlated with  
145 offspring survivorship; (2) the extent to which increasing maternal age changes offspring  
146 response to the well-studied anti-aging therapy of caloric restriction; and (3) how maternal age  
147 and offspring diet interact to determine offspring relative age-specific reproduction as a measure  
148 of evolutionary fitness.

149

## 150 **MATERIALS AND METHODS**

### 151 **Rotifer and phytoplankton culture**

152 We used the Russian strain of the monogonont rotifer *Brachionus manjavacas* (BmanRUS) in all  
153 experiments. Rotifers were fed the chlorophyte algae *Tetraselmis suecica*, which was  
154 maintained in semi-continuous culture in bubbled 2-L flasks of f/2 medium<sup>77</sup>, made with 15ppt  
155 Instant Ocean (Instant Ocean Spectrum Brands, Blacksburg, VA). We cultured rotifers and  
156 algae at 21 °C under cool-white fluorescent bulbs at an intensity of 100  $\mu\text{E m}^{-2}\text{s}^{-1}$  on a 12:12 h  
157 light:dark cycle.

158

### 159 **Offspring lifespan, fecundity, and response to caloric restriction**

160 We conducted life table experiments as previously described<sup>78</sup>. To avoid residual undefined  
161 parental effects on our experimental populations, we synchronized the maternal ages of the  
162 great-grand and grand-maternal generations for the experimental maternal (F0) cohort by

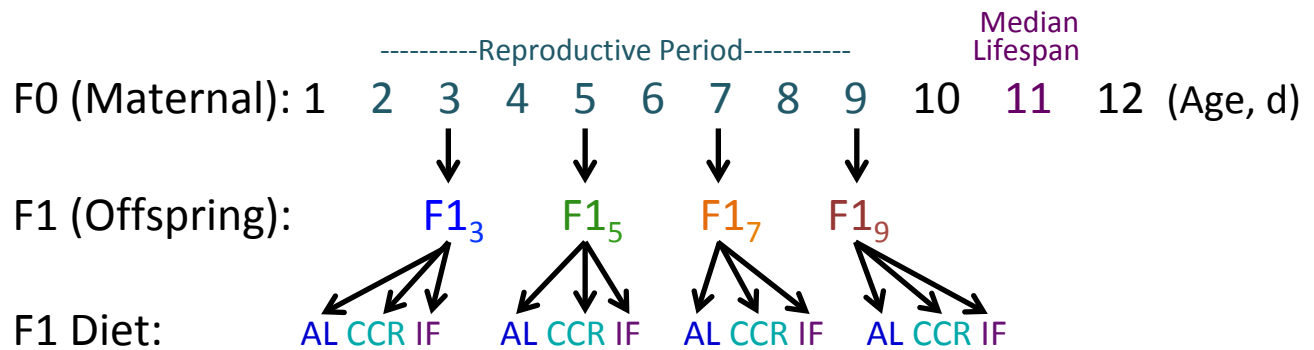

Fig. 1. Experimental design to test the combined effects of maternal age and offspring diet on offspring lifespan and fecundity. Newly-hatched offspring (F1) were collected from *ad libitum* fed, age-synchronized amictic (asexual) maternal females (F0, n = 180) at maternal ages of 3, 5, 7, and 9 days (F1<sub>3</sub>, F1<sub>5</sub>, F1<sub>7</sub>, and F1<sub>9</sub>, respectively). Offspring were subjected to an *ad libitum* diet (AL;  $6 \times 10^5$  cells ml<sup>-1</sup> *Tetraselmis suecica*), chronic caloric restriction (CCR;  $6 \times 10^4$  cells ml<sup>-1</sup> *T. suecica*, a 90% reduction in food relative to AL); or intermittent fasting (IF; alternate day AL and starvation). All rotifers were housed individually in 1 ml 15 ppt Instant Ocean and algae in 24-well plates. Survival and reproduction of the F0 and F1 were scored daily until all rotifers had died. For each F1 maternal age X diet cohort, n = 69 - 72.



163 collecting eggs from 3 – 5 d old females for two generations. Briefly, we harvested eggs from a  
164 batch culture by vortexing and micropipette isolation, let these hatch and then grow in *ad libitum*  
165 *T. suecica* (AL;  $6 \times 10^5$  cells ml<sup>-1</sup>) for 5 days, and then collected the eggs from that culture. This  
166 was repeated twice, so that the maternal and grand-maternal ages for our experimental F0  
167 cohort were 3 – 5 days old.

168  
169 To obtain the F0 generation, eggs from this age-synchronized culture were harvested as above,  
170 allowed to hatch over 16 hours, and neonates were randomly deposited individually into 1 ml of  
171 15 ppt seawater and AL *T. suecica* in wells of unshaken 24-well tissue culture plates (n=187).  
172 Every 24 h, we recorded survival, reproductive status (whether carrying eggs), and the number  
173 of live offspring and unhatched, dropped eggs for each individual; the female was then  
174 transferred to a new well with fresh algae of the appropriate concentration. To obtain the F1  
175 cohorts, at the specified maternal ages we isolated one female neonate hatched within the  
176 previous 24 h from each F0 female and placed these in wells of unshaken 24-well plates with 1  
177 ml of the appropriate food concentration (n = 69 - 72 for each F0 age X F1 diet cohort). All F1  
178 cohorts were collected from the same set of 187 mothers. Offspring were randomly distributed  
179 among food treatments. We tested for effects of non-independence of offspring lifespan using  
180 linear regression and found no correlation in lifespan between individual F0s and their offspring  
181 for any maternal age or diet cohort. Sample size was determined by power analysis to detect a  
182 0.75 d (approx. 7%) difference in lifespan using the program G\*Power<sup>79</sup>.

183  
184 As a measure of offspring ability to mount a beneficial adaptive response, we subjected F1  
185 individuals from 3, 5, 7, and 9 d old mothers (F1<sub>3</sub>, F1<sub>5</sub>, F1<sub>7</sub>, and F1<sub>9</sub>, respectively) to either  
186 chronic caloric restriction (CCR; 10% of AL food levels;  $6 \times 10^4$  cells ml<sup>-1</sup>) or intermittent fasting  
187 (IF; feeding AL or starving every other day), two treatments known to increase lifespan in rotifers

188 (experimental design in Fig. 1). Survival, reproductive status, and numbers of offspring and  
189 unhatched eggs were recorded every 24 hours for the caloric restriction experiments. No  
190 blinding was used.

191

## 192 **Maternal investment**

193 To determine if maternal investment in reproduction changes with maternal age, we conducted  
194 a separate experiment to measure size and shape of female and male eggs from 3, 6, 9, and 11  
195 d old mothers. Age-synchronized females were placed 2 per well in 1 ml of  $6 \times 10^5$  cells  $\text{ml}^{-1}$  *T.*  
196 *suecica* in 15 ppt Instant Ocean in 24-well plates, and transferred daily to new wells with fresh *T.*  
197 *suecica*. At the specified ages, 48 – 72 rotifers were collected and vortexed or sheared through  
198 a 23 gauge needle to separate eggs (normally carried externally by females until hatching) from  
199 females. For egg size and shape, we fixed samples in 5% formalin (final concentration). Before  
200 imaging, formalin was removed by centrifugation and aspiration, and eggs were washed twice  
201 with Instant Ocean. At least 25 each of male and female eggs were imaged with a Zeiss  
202 AxioCam at 400X magnification on an Axioskop (Carl Zeiss, Inc., Thornwood, NY). We  
203 measured egg diameter, area, and roundness (inverse of aspect ratio between longest and  
204 shortest axes) using the image analysis software, Fiji<sup>80</sup>.

205

206 As a quantitative assessment of changes in nutrient allocation to offspring, in a separate  
207 experiment we measured neutral lipids in newly hatched F1 neonates from 3, 6, 9, and 11 d old  
208 mothers. These lipids are maternally distributed to offspring and used as a source of nutrition by  
209 neonates post-hatching. We anesthetized 6-h old neonates in 1.0  $\mu\text{M}$  bupivacain for 10 minutes  
210 before fixation in 2.5% formalin. Neonates were stained with 0.5  $\mu\text{g } \mu\text{l}^{-1}$  Nile Red in acetone for  
211 5 minutes and washed twice with 15 ppt Instant Ocean. For each maternal age, we imaged 20  
212 stained and 5 unstained neonates at 200X with a Zeiss LSM 710 Confocal Microscope (Carl

213 Zeiss, Inc., Thornwood, NY) using a 514 nm laser excitation with 559-621 nm emission and a  
214 458/514 nm main beam splitter, imaging the entire animal volume with 1  $\mu$ M slices. Lipid volume  
215 per animal volume was quantified using Fiji <sup>80</sup>.

216

217 For an additional estimate of changes in maternal investment in reproduction with increasing  
218 maternal age, we measured resistance to starvation in unfed F1s from 3, 6, 9 and 11 d old  
219 mothers in a separate experiment. We isolated eggs from mothers as described above. Eggs  
220 hatched overnight in 15 ppt Instant Ocean, so that neonates were never fed, after which we  
221 placed 2 neonates per well in 1 ml of 15 ppt Instant Ocean in 24-well plates (n = 48 for each  
222 maternal age cohort). As above, sample size was determined by power analysis to detect a  
223 difference in lifespan of 0.75 d between groups <sup>79</sup>. We scored survival twice per 24 hours, at 8  
224 and 16-hour intervals, until all individuals had died.

225

## 226 **Statistical analyses**

227 We used Prism 7.0a for graphing and statistical analyses. From lifespan data, we calculated  
228 median and maximum (age of 5% survivorship) lifespan. Kaplan Meier survivorship curves were  
229 constructed from lifespan data; data were right-censored in the event an individual was lost prior  
230 to death or due to accidental death caused by mishandling. Significance of differences between  
231 median lifespans was calculated using a Mantel-Cox log-rank test. We used ANCOVA to  
232 determine significance of differences between mortality rate (the slope,  $\beta$ ) and onset of  
233 senescence (the intercept,  $\alpha$ ) from a Gompertz function fitted to age-specific hazard rate. We  
234 used one-way ANOVA with Tukey's test for multiple comparisons to determine significant  
235 differences between egg size, shape, and lipid content across maternal ages. We used two-way  
236 ANOVA with Tukey's test for multiple comparisons to determine significant differences in lifetime  
237 reproduction, non-viable embryos, or reproductive period between F1s due to maternal age or

238 F1 diet. To determine the effect of interaction between maternal age and F1 diet on F1 lifespan  
239 and F1 reproduction, we used two-way ANOVA. Correlations between lifespan and reproduction  
240 were fit with a second-order polynomial (quadratic) equation; we also tested linear and third-  
241 order polynomial regressions, and found quadratic equations to be the best fit. Differences  
242 between reproduction-lifespan correlations were determined using an extra-sum-of-squares F-  
243 test.

244

## 245 **RESULTS**

### 246 **Offspring Lifespan**

247 Both maternal age and offspring diet affected offspring lifespan (Fig. 2, Fig. 3). Median offspring  
248 lifespan declined significantly with increasing maternal age, but maximum lifespan did not  
249 change (Supplementary Table 1). Both CCR and IF significantly increased median and  
250 maximum lifespan in all F1s, regardless of maternal age (Fig. 3, Supplementary Table 1). Under  
251 CCR, the percent increase in median lifespan was greater for F1<sub>5</sub> - F1<sub>9</sub> than for F1<sub>3</sub>, and under  
252 IF it was greater for F1<sub>7</sub> and F1<sub>9</sub> than for F1<sub>3</sub> and F1<sub>5</sub> (Supplementary Table 1). There was no  
253 significant correlation between lifespans of individual mothers and their offspring for any  
254 maternal age or under any F1 diet (data not shown,  $R^2 < 0.07$  for all linear regressions). There  
255 was a significant interaction between maternal age and offspring diet to determine F1 lifespan  
256 (4.26% of total variance,  $F_{6, 791} = 7.33$ ,  $p < 0.0001$ ). F1 diet had a greater influence on F1  
257 lifespan (10.61% of total variance,  $F_{2, 791} = 54.78$ ,  $p < 0.0001$ ) than did F0 age ( $F_{3, 791} = 26.66$ ,  $p$   
258  $< 0.0001$ ).

259

260 We estimated the onset and rate of aging by fitting a Gompertz function to the age-specific  
261 hazard rate (Fig. 2 D-F). Linear regression showed a change in both onset and rate of mortality  
262 under caloric restriction (Fig. 3), though this varied depending on maternal age (Fig. 2;

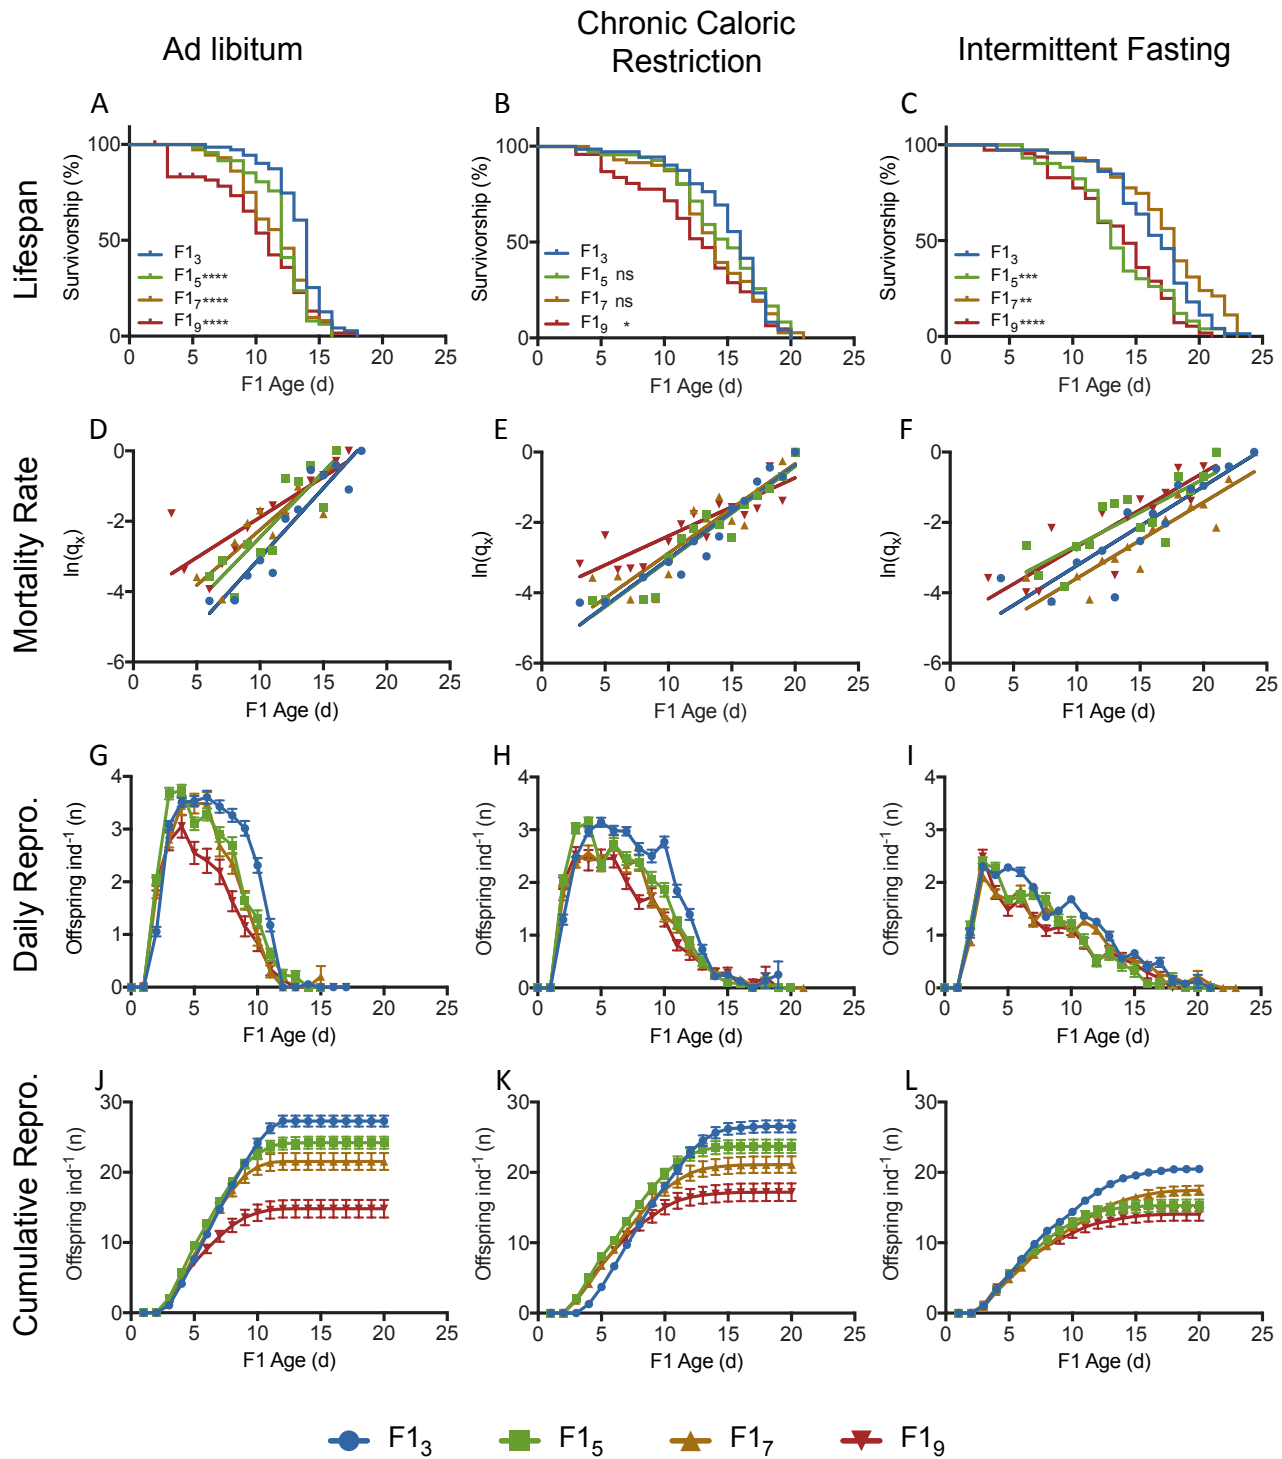

Fig. 2. Lifespan and fecundity of F1s from 3, 5, 7 and 9 d old mothers (F1<sub>3</sub>, F1<sub>5</sub>, F1<sub>7</sub>, and F1<sub>9</sub>, respectively) under different diets. Survivorship (**A-C**), hazard rate (**D-F**), daily fecundity (**G-I**), and cumulative fecundity (**J-L**) for F1s fed under *ad libitum* (AL; **A, D, G, J**), chronic caloric restriction (CCR; **B, E, H, K**) or intermittent fasting (IF; **C, F, I, L**) conditions. Significant differences from F1<sub>3</sub> are given by \* ( $p < 0.05$ ), \*\* ( $p < 0.01$ ), \*\*\* ( $p < 0.001$ ), or \*\*\*\* ( $p < 0.0001$ ), or ns = not significant. Additional significance of differences in survivorship and hazard rate is given in Supplementary Table 1. Statistical significance of differences in reproduction is shown in Supplementary Table 2. For each F1 maternal age X diet cohort,  $n = 69 - 72$ .

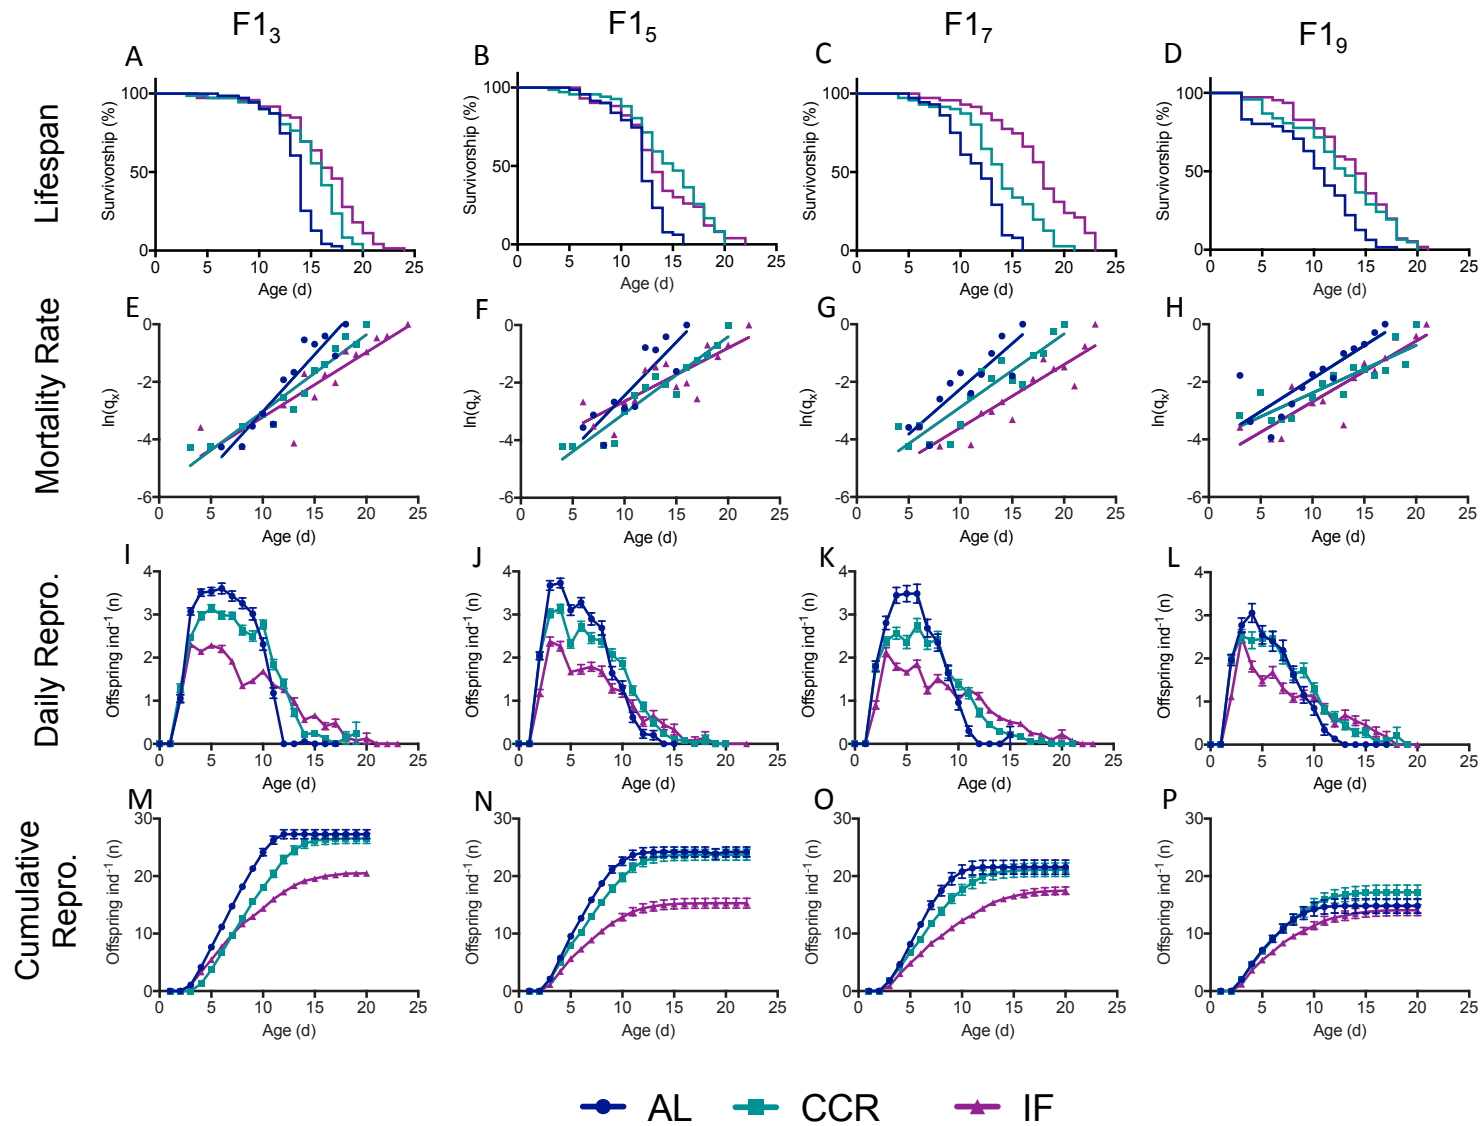

Fig. 3. Lifespan and fecundity of F1s under different caloric restriction diets from mothers of different ages. Survivorship (A-D), hazard rate (E-H), daily fecundity (I-L), and cumulative fecundity (M-P) for F1s from 3, 5, 7, or 9 d old mothers (F1<sub>3</sub>, F1<sub>5</sub>, F1<sub>7</sub>, and F1<sub>9</sub>, respectively).  $n = 69 - 72$  for each F1 maternal age X diet cohort. Statistical significance of differences in survivorship and hazard rate is given in Supplementary Table 1. Statistical significance of differences in reproduction is shown in Supplementary Table 2.

263 Supplementary Table 1). The onset of mortality ( $\alpha$ ) was delayed under CCR and IF for offspring  
264 of all maternal ages. For younger maternal ages (F1<sub>3</sub> and F1<sub>5</sub>), the onset of mortality was later  
265 under IF than CCR, while the reverse was true for offspring from later maternal ages (F1<sub>7</sub> and  
266 F1<sub>9</sub>). While the rate of aging ( $\beta$ ) was significantly lower under both CCR and IF for F1<sub>3</sub>, at later  
267 maternal ages there was no significant difference between the Gompertz regression slopes  
268 under AL and CCR or IF, and differences in lifespan under caloric restriction were primarily due  
269 to decreased mortality at early ages, rather than a decline in the rate of aging.

270

### 271 **Offspring fecundity and reproductive schedule**

272 Increasing maternal age suppressed daily and total reproduction in the F1 (Figs. 2, 3, 4,  
273 Supplementary Table 2). While F1 CCR slightly depressed daily reproduction relative to AL, the  
274 reproductive period was extended, resulting in the same lifetime reproduction (Supplementary  
275 Table 3, Figs. 3, 4). Although the reproductive period was also extended under IF  
276 (Supplementary Table 3, Fig. 4), daily reproduction was approximately half that of AL, and  
277 discontinuous reproduction (days of no reproduction interrupting the reproductive period) was  
278 significantly higher (Supplementary Table 4), leading to significantly lower lifetime reproduction  
279 under IF (Fig 4).

280

281 Total lifetime fecundity declined significantly with increasing maternal age under all F1 diets (Fig.  
282 4). While lifetime fecundities were similar under AL and CCR for young and middle maternal  
283 ages (F1<sub>3</sub> – F1<sub>7</sub>), for F1<sub>9</sub> the decline in fecundity under AL was partially rescued by CCR.  
284 Maternal age and F1 diet interacted significantly to determine lifetime F1 fecundity (2.0% of the  
285 total variance,  $F_{6, 787} = 3.39$ ,  $p = 0.0026$ ). Maternal age had a greater impact on fecundity (13.7%  
286 of the total variance,  $F_{3, 787} = 46.62$ ,  $p < 0.0001$ ) than did F1 diet (7.1% of the variance,  $F_{2, 787} =$   
287 36.04,  $p < 0.0001$ ).

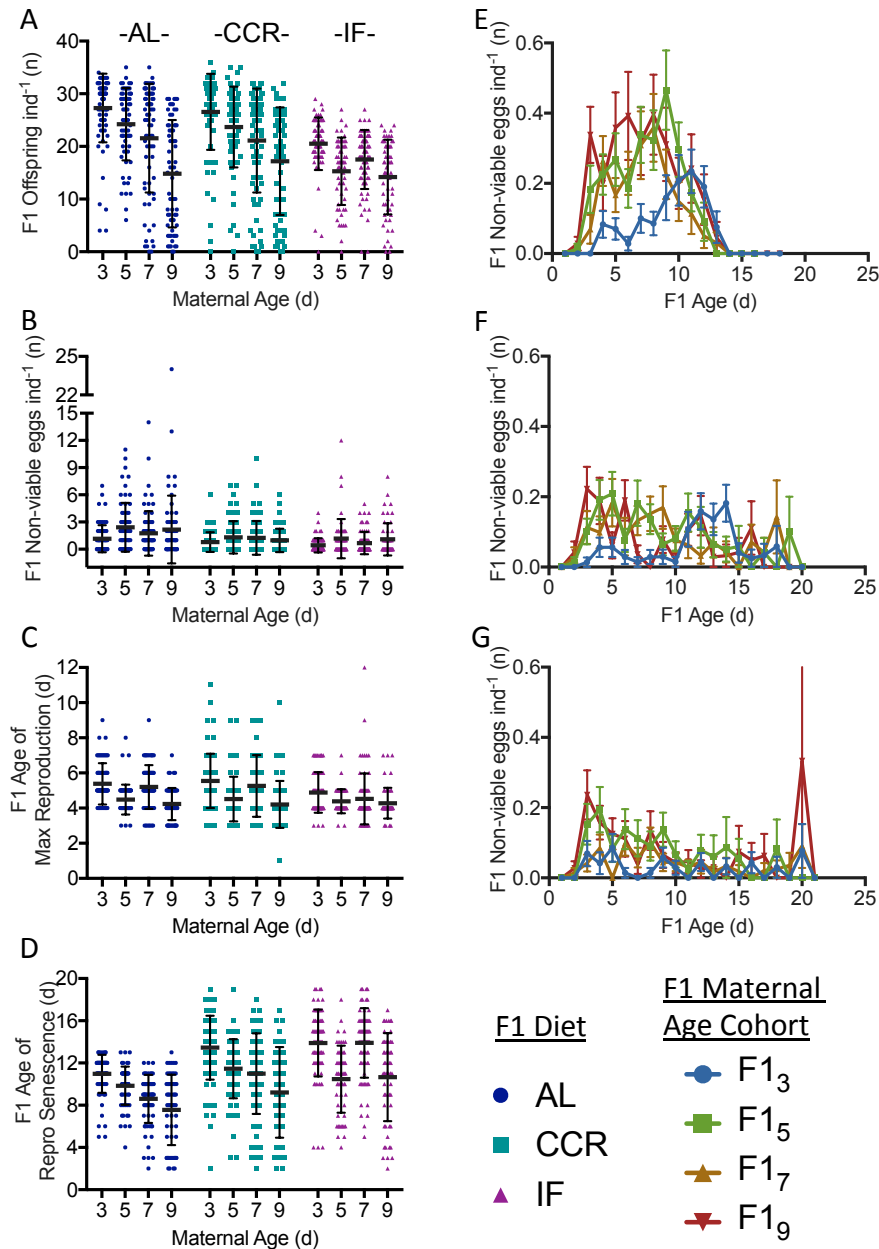

Fig. 4. Reproduction in F1s subject to caloric restriction from 3, 5, 7, and 9-d old mothers (F1<sub>3</sub>, F1<sub>5</sub>, F1<sub>7</sub>, and F1<sub>9</sub>, respectively) showing lifetime fecundity (A), number of non-viable offspring (B), age of maximum reproduction (C), and reproductive senescence (D). Schedule of non-viable offspring production for F1s under *ad libitum* (AL; E), chronic caloric restriction (CCR; F) and intermittent fasting (IF; G) diets. Significance of differences in reproduction is given in Supplementary Table 2. For each F1 maternal age X diet cohort, n = 69 – 72.



288

289 Non-viable embryo production was strongly influenced by both maternal age ( $F_{3, 785} = 6.33$ ,  $p =$   
290  $0.0003$ ) and F1 diet ( $F_{2, 785} = 19.32$ ,  $p < 0.0001$ ) (Fig. 4). The total number of non-viable offspring  
291 (unhatched eggs) produced by F1s under AL increased significantly with maternal age, doubling  
292 for F1<sub>5</sub> and F1<sub>9</sub> (Supplementary Table 2). The timing of non-viable embryo production was  
293 strikingly different between the offspring of young and old mothers under AL. For F1<sub>3</sub>,  
294 non-viable embryos were low early in life and reached a maximum of  $0.2 \text{ ind}^{-1} \text{ d}^{-1}$  late in life at  
295 age 11 d. In contrast, non-viable embryos peaked near  $0.4 \text{ ind}^{-1} \text{ d}^{-1}$  for F1<sub>5</sub> and F1<sub>7</sub> at ages 9 d  
296 and 8 d, respectively. For F1<sub>9</sub>, non-viable embryos were produced at a relatively high rate  
297 throughout life, peaking at  $0.4 \text{ ind}^{-1} \text{ d}^{-1}$  at age 6 d. Non-viable embryo production declined  
298 significantly under CCR and IF relative to under AL for F1s from older mothers ( $p < 0.001$ ,  
299 except for F1<sub>7</sub> under CCR, which was not significantly lower) but was still low in early life for  
300 offspring of young mothers and high in early life for F1<sub>9</sub>.

301

302 Under all food conditions, increasing maternal age significantly decreased the reproductive  
303 period and increased the post-reproductive period as a percentage of total lifespan ( $p < 0.0007$   
304 for F1<sub>7</sub> and F1<sub>9</sub> relative to F1<sub>3</sub>; Fig. 5, 6; Supplementary Table 3). This effect was greatest for AL  
305 and CCR diets, under which the reproductive period was significantly shorter and the post-  
306 reproductive period was significantly longer for F1<sub>5</sub>, F1<sub>7</sub>, and F1<sub>9</sub> than for F1<sub>3</sub>, both in actual  
307 days and as a percent of lifespan (Supplementary Table 3, Fig. 5, 6). The pre-reproductive  
308 period was not significantly changed by either maternal age or diet except for a slight increase  
309 as a percent of total lifespan (though not in actual days) for F1<sub>9</sub> under AL conditions.

310

311 Both diet and maternal age changed reproductive continuity (Table 4). Only 2.8% of the F1<sub>3</sub> AL  
312 cohort had discontinuous reproduction; this increased with maternal age to 7.7% for F1<sub>9</sub> AL,

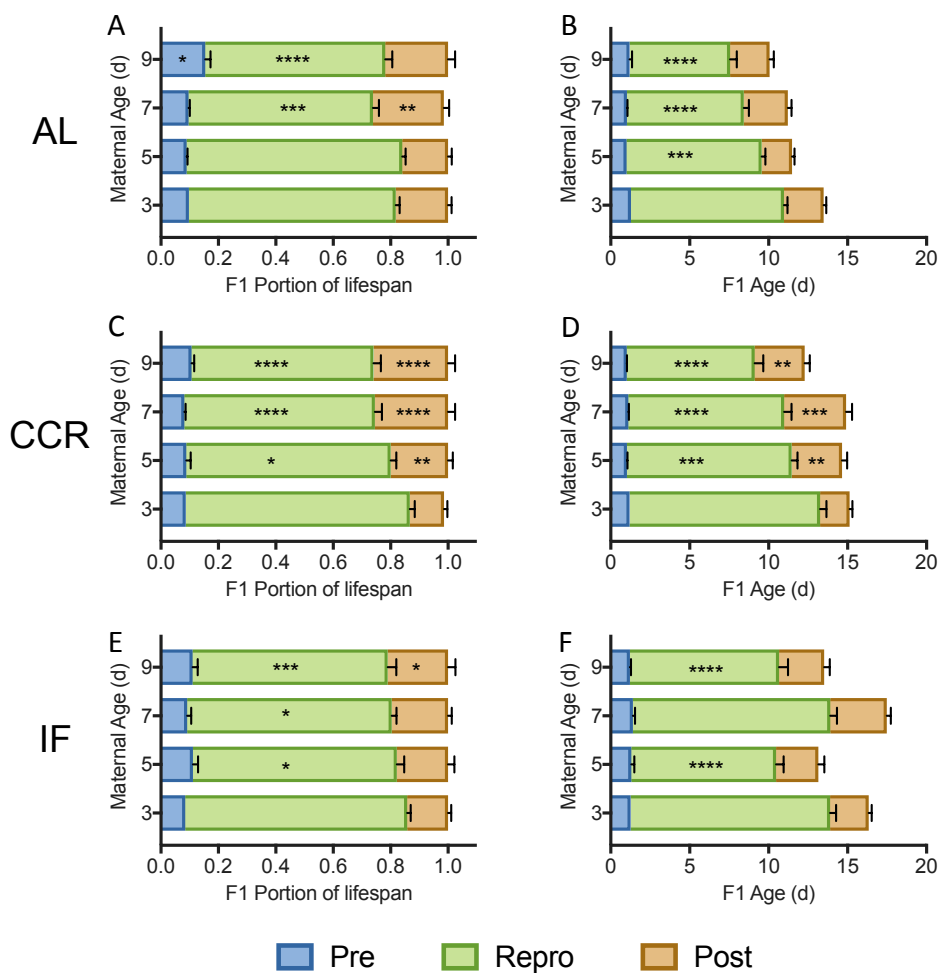

Fig. 5. The reproductive schedule of F1s under *ad libitum* (AL; **A-B**), chronic caloric restriction (CCR; **C-D**), or intermittent fasting (IF; **E-F**), shown as a portion of lifespan (left) and as actual days (right). Significant differences in the length of the pre-reproductive, reproductive, and post-reproductive periods in F1<sub>5</sub> – F1<sub>9</sub> relative to in F1<sub>3</sub> (Two-way ANOVA with Dunnett’s multiple comparison test) are noted as \* ( $p < 0.05$ ), \*\* ( $p < 0.01$ ), \*\*\* ( $p < 0.001$ ), or \*\*\*\* ( $p < 0.0001$ ). For each F1 maternal age X diet cohort,  $n = 69 - 72$ .

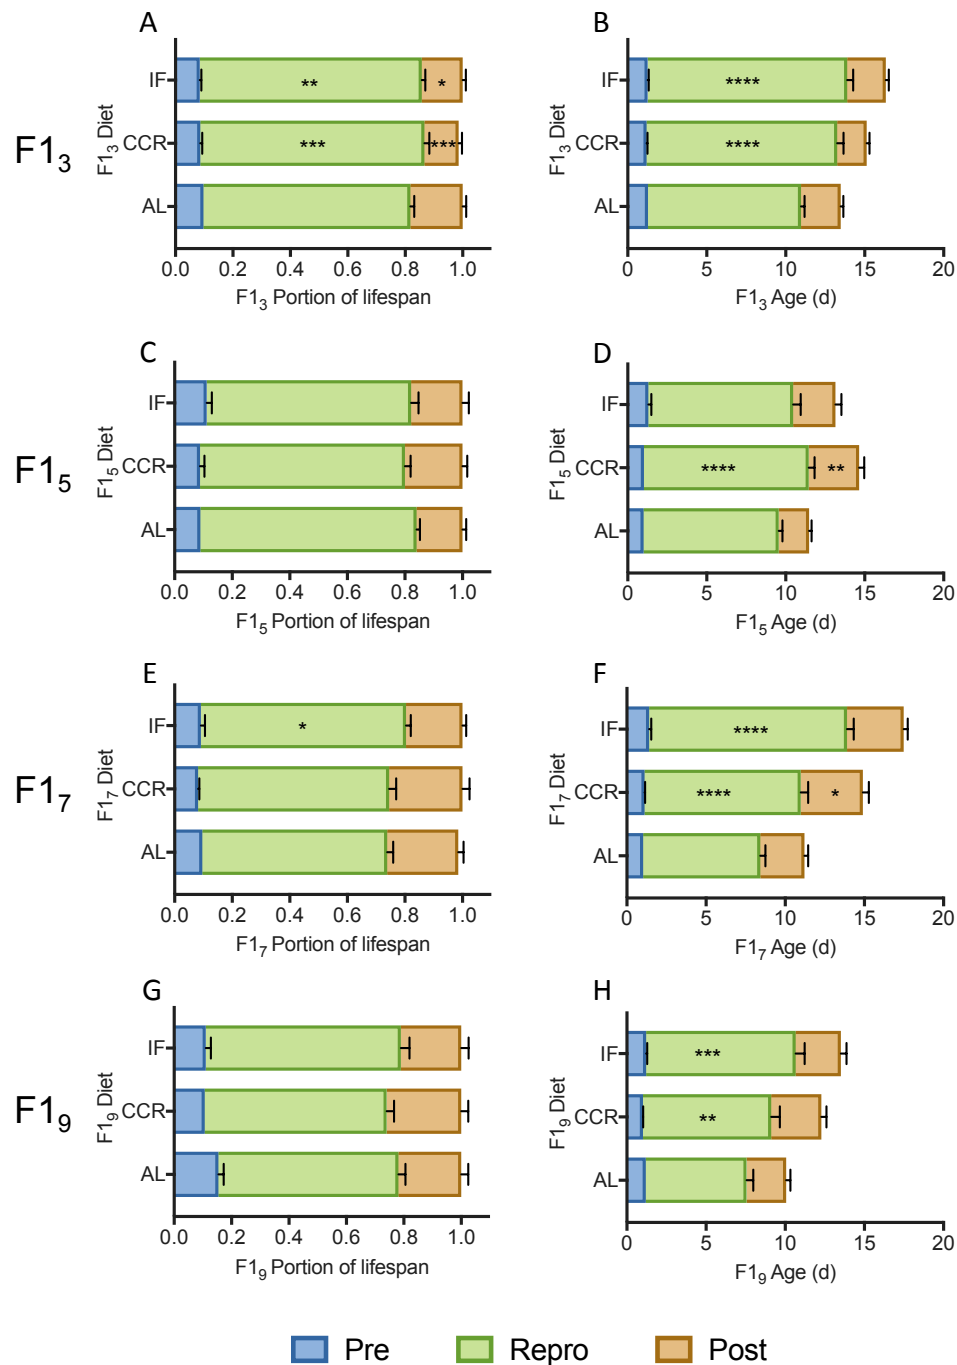

Fig. 6. The reproductive schedule of F1s from 3 d (A-B), 5 d (C-D), 7 d (E-F), and 9 d (G-H) old mothers, under *ad libitum* (AL), chronic caloric restriction (CCR), or intermittent fasting (IF) diets, shown as a portion of lifespan (left) or as actual days (right). Significant differences in the length of the pre-reproductive, reproductive, and post-reproductive periods in F1<sub>5</sub> – F1<sub>9</sub> relative to in F1<sub>3</sub> (Two-way ANOVA with Dunnetts multiple comparison test) are noted as \* ( $p < 0.05$ ), \*\* ( $p < 0.01$ ), \*\*\* ( $p < 0.001$ ), or \*\*\*\* ( $p < 0.0001$ ). For each F1 maternal age X diet cohort,  $n = 69 - 72$ .

313 although the difference was not significant. Diet had the greatest effect, with reproductive  
314 discontinuity ranging from 12.3 – 17.8% under CCR and 31.5 – 57.7% under IF.

315

316 The age of maximum reproduction was generally younger under IF than AL, and for any given  
317 diet, the age of maximum reproduction was lower with increasing maternal age (Fig. 4). The  
318 interaction between maternal age and diet was not significant ( $p = 0.08$ ), though both variables  
319 significantly impacted age of maximum reproduction independently, with maternal age  
320 accounting for 9.7% of the variation ( $F_{3, 777} = 28.71$ ,  $p < 0.0001$ ) and diet for 1.4% of the variation  
321 ( $F_{2, 777} = 6.25$ ,  $p = 0.002$ ). Under AL conditions, the age of maximum reproduction was a full 1.15  
322 days earlier for F1<sub>9</sub> than for F1<sub>3</sub>. This demonstrates earlier reproductive senescence rather than  
323 earlier development, given that there was no difference in the length of time to first reproduction  
324 among any maternal age cohorts (Fig. 5). At the peak of reproduction for F1<sub>9</sub> the number of  
325 offspring per individual was already higher for F1<sub>3</sub>; F1<sub>3</sub> reproduction peaked a day later, when  
326 F1<sub>9</sub> reproduction was already declining.

327

328 Maternal age and F1 diet interacted to determine the age of reproductive senescence (Fig. 4),  
329 accounting for 3.8% of the total variance ( $F_{6, 778} = 6.95$ ,  $p < 0.0001$ ). Diet alone accounted for  
330 11.1% of variance ( $F_{2, 778} = 60.69$ ,  $p < 0.0001$ ), and maternal age for 12.3% of the variance ( $F_{3, 778}$   
331  $= 44.71$ ,  $p < 0.0001$ ). For any given diet, the age of reproductive senescence in F1s was  
332 significantly younger with increasing maternal age, except for F1<sub>7</sub> under IF, in which  
333 reproductive senescence was later than for F1<sub>5</sub> (Fig. 4, Supplementary Table 4). Both CCR and  
334 IF significantly delayed reproductive senescence, relative to AL-fed F1s.

335

336

337 **Maternal Investment**

338 We measured female and male egg size and shape, female neonate lipid content, female  
339 offspring time to reproductive maturity, and female offspring starvation resistance as estimates  
340 of maternal investment in reproduction (Supplementary Fig. 2). As maternal age increased from  
341 3 d to 9 d, female egg area and roundness increased significantly (One-way ANOVA with  
342 Tukey's multiple comparison test,  $p < 0.0001$  for all comparisons). At a maternal age of 11 d,  
343 female egg area and roundness significantly decreased. Male eggs showed a similar pattern of  
344 increase in size with increasing maternal age and decreased roundness at the oldest maternal  
345 age (Supplementary Fig. 2). Neonate lipid content decreased slightly with increasing maternal  
346 age, and was only significantly different between F1<sub>3</sub> and F1<sub>11</sub> (One-way ANOVA,  $p = 0.044$ ).  
347 We found no significant difference in the time to first reproduction between F1 maternal age or  
348 diet cohorts (Fig. 5, 6). Mean lifespan of offspring under starvation conditions decreased  
349 significantly with maternal age between F1<sub>3</sub> and F1<sub>9</sub>, then remained constant for F1<sub>11</sub>  
350 (Supplementary Fig. 2).

351

### 352 **Relative offspring fitness**

353 CCR and IF had different impacts on the correlation between total lifetime fecundity and lifespan.  
354 For all F1 maternal age cohorts, the lifespan-reproduction relationship was significantly different  
355 between AL and IF ( $p < 0.0001$ , extra-sum-of-squares F-test for difference in best-fit values  
356 between quadratic equations; Fig. 7). The lifespan-reproduction correlation under CCR was  
357 significantly different from under AL for F1<sub>3</sub> and F1<sub>7</sub> ( $p < 0.01$ ) but not for F1<sub>5</sub> ( $p = 0.06$ ) or F1<sub>9</sub> ( $p$   
358  $= 0.22$ ). The slope for lifespan versus reproduction was much lower under IF than under either  
359 AL or CCR, suggesting a greater decrease in lifetime reproduction with increasing lifespan  
360 under IF. Under food limitation, the slope of the lifespan-reproduction correlation decreased  
361 significantly in the F1<sub>5</sub>, F1<sub>7</sub>, and F1<sub>9</sub> cohorts relative to the F1<sub>3</sub> ( $p < 0.05$ ; extra-sum-of-squares

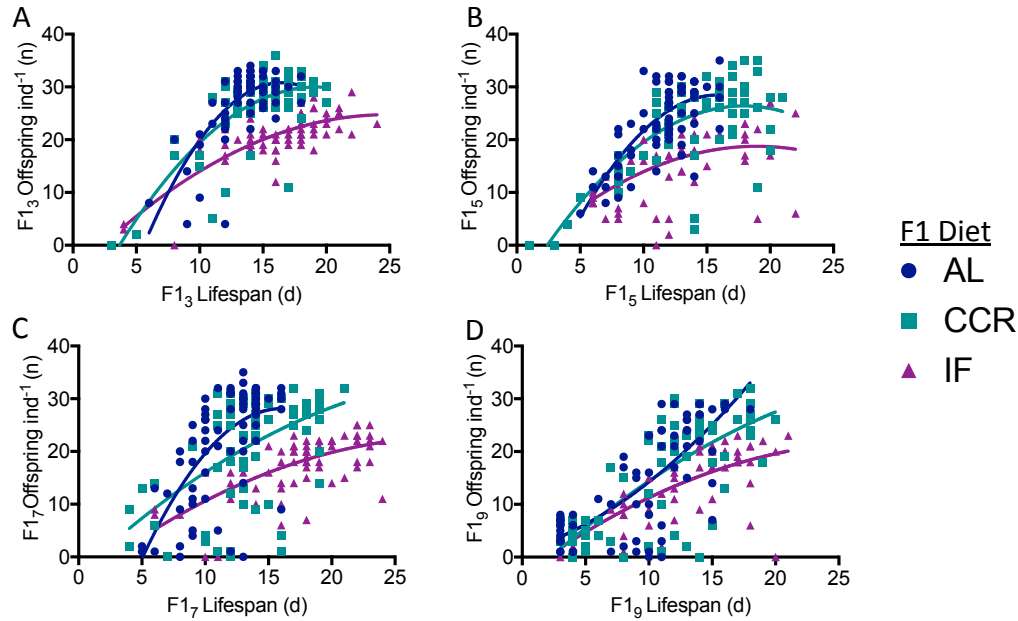

Fig. 7. Trade-off between lifespan and lifetime reproduction for F1<sub>3</sub> (A), F1<sub>5</sub> (B), F1<sub>7</sub> (C), and F1<sub>9</sub> (D) under *ad libitum* (AL), chronic caloric restriction (CCR), or intermittent fasting (IF) diets. Relationships are fitted with second-order polynomial (quadratic) equations, and differences between the best-fit values for AL and CCR or AL and IF were determined with an extra-sum-of-squares F-test. CCR was significantly different from AL for F1<sub>3</sub> and F1<sub>7</sub> ( $p < 0.01$ ) but not for F1<sub>5</sub> ( $p = 0.06$ ) or F1<sub>9</sub> ( $p = 0.22$ ). The regression for IF was significantly different from that for AL for all cohorts ( $p \leq 0.0001$ ). For each F1 maternal age X diet cohort,  $n = 69 - 72$ .

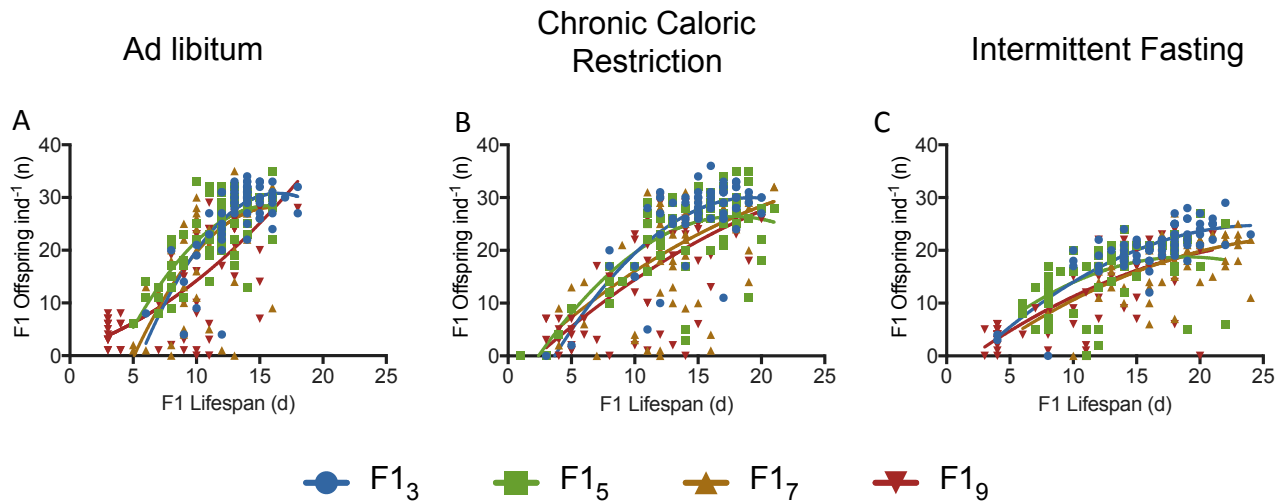

Fig. 8. Trade-off between lifespan and lifetime reproduction for F1s from 3, 5, 7, or 9-d old mothers under *ad libitum* (AL; **A**), chronic caloric restriction (CCR; **B**), or intermittent fasting (IF; **C**). Relationships were fitted with second order polynomial (quadratic) equations, and differences between F1<sub>3</sub> and older maternal age cohorts were tested using an extra-sum-of-squares F-test. Under CCR and IF, the lifespan-reproduction correlation was significantly different for the F1<sub>5</sub>, F1<sub>7</sub>, and F1<sub>9</sub> cohorts relative to the F1<sub>3</sub> ( $p < 0.05$ ). For each F1 maternal age X diet cohort,  $n = 69 - 72$ .

362 F-test for difference in best-fit values between quadratic equations) suggesting a reduction in  
363 fecundity with increasing lifespan under CCR and IF in offspring from older mothers (Fig. 8).

364

365 We measured age-specific fitness as  $l_x m_x$ , in which reproduction,  $l$ , is multiplied by survivorship,  
366  $m$ , for a given day,  $x$ . Relative age-specific fitness, defined here as the difference in  $l_x m_x$   
367 between calorically restricted and AL-fed rotifers within a maternal age cohort (Fig. 9) or  
368 between older maternal age cohorts and F1<sub>3</sub> for a given diet (Fig. 10), declined with maternal  
369 age. Under both CCR and IF, fitness of all F1 maternal age cohorts was much lower in early life  
370 relative to AL (Fig. 9). Relative fitness was greater under CCR or IF only late in life, at ages  
371 beyond which most AL rotifers were post-reproductive and survivorship was low; this late-life  
372 fitness benefit decreased with increasing maternal age. The cumulative relative fitness,  
373 measured as net area under the curve, was negative for all maternal age comparisons for a  
374 given diet, and for all diet comparisons for a given age, except for F1<sub>9</sub> CCR relative to F1<sub>9</sub> AL,  
375 which was slightly positive (Fig. 9). The relative fitness under IF was generally lower than that  
376 under CCR throughout life. For a given diet, the fitness of older maternal age cohorts relative to  
377 F1<sub>3</sub> was lower throughout life and decreased with increasing maternal age (Fig. 10).

378

## 379 **DISCUSSION**

380 To our knowledge, this study provides the first evidence that maternal age affects offspring  
381 response to caloric restriction, a lifespan extending intervention conserved across a range of  
382 taxa. Because maternal environment, physiology, and age are all known to influence offspring  
383 phenotype and lifespan, we hypothesized that maternal age might affect offspring adaptive  
384 response to caloric restriction. Previous studies have investigated the effect of maternal age on  
385 offspring phenotype, but prior work has not examined the combinatorial effect of maternal age,  
386 maternal investment, and offspring environment on offspring lifespan, daily and total



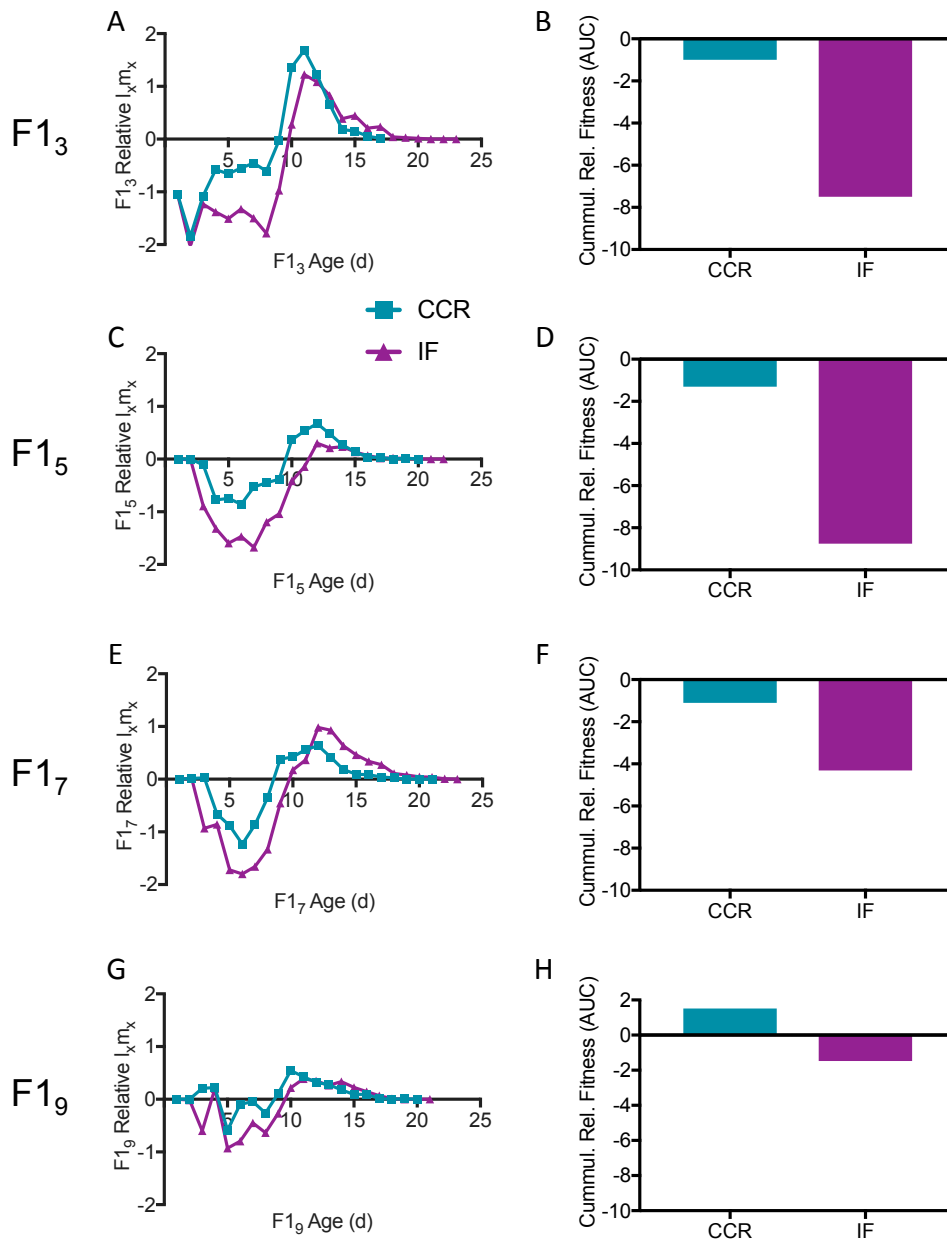

Fig. 9. Relative age-specific  $I_x m_x$ , a measure of relative fitness. Age-specific daily reproduction ( $I_x$ ) multiplied by survivorship ( $m_x$ ) for F1s under chronic caloric restriction (CCR) or intermittent fasting (IF) is given relative to  $I_x m_x$  for *ad libitum* (AL) fed F1s. Relative age-specific fitness (left) and relative cumulative fitness (right) are shown for offspring from different age mothers: (A-B) F1<sub>3</sub>, (C-D) F1<sub>5</sub>, (E-F) F1<sub>7</sub>, (G-H) F1<sub>9</sub>. For each F1 maternal age X diet cohort, n = 69 – 72.

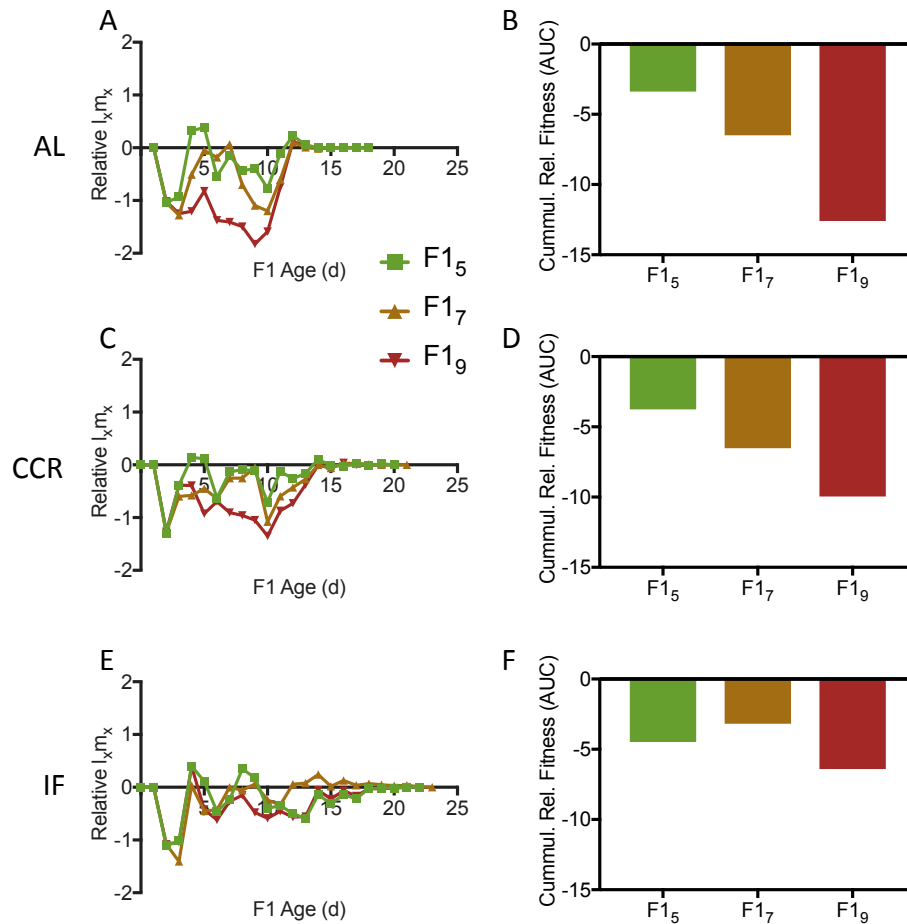

Fig. 10. Relative age-specific  $I_x m_x$ , a measure of relative fitness. Age-specific daily reproduction ( $I_x$ ) multiplied by survivorship ( $m_x$ ) for offspring of older mothers is given relative to  $I_x m_x$  for offspring of the youngest mothers (F1<sub>3</sub>) under *ad libitum* (AL; **A**), chronic caloric restriction (CCR; **C**) and intermittent fasting (IF; **E**). Cumulative relative age-specific fitness (net area under the curve) is shown for AL (**B**), CCR (**D**), and IF (**F**). For each F1 maternal age X diet cohort,  $n = 69 - 72$ .

387 reproduction, and reproductive schedule. Increasing maternal age changed not only offspring  
388 lifespan and the degree of lifespan extension under caloric restriction, but also the length of the  
389 reproductive period, fecundity, and the trade-off between lifespan extension and reproduction.  
390 The finding that maternal age impacts the magnitude of lifespan extension and the level of  
391 resource allocation trade-off has implications for the widespread use of CR and CR mimetics as  
392 anti-aging therapies in humans, and should be verified in mammalian models of aging.

393

### 394 **Increasing maternal age decreases offspring lifespan and fecundity**

395

396 Consistent with earlier studies in rotifers and other species, offspring of the oldest mothers had  
397 a significantly shorter median lifespan than the offspring from the youngest mothers  
398 <sup>23,28,29,31,33,40,81,82</sup>. Among AL-fed F1s, earlier onset of aging, rather than an increased rate of  
399 aging, appeared to be responsible for the observed decrease in lifespan in old-mother offspring.

400

401 The decline in offspring fecundity with increasing maternal age found in this and previous rotifer  
402 studies <sup>23,76</sup> differs from some reports for *C. elegans*, *Daphnia*, and *Drosophila*, in which  
403 offspring from the youngest or smallest mothers have been shown to have lower lifetime  
404 reproduction than those from older mothers <sup>34,40,83</sup>. One possible explanation is that differences  
405 in reproductive strategy may drive the differences in offspring outcomes with changing maternal  
406 age among varied small, short-lived invertebrate species. *Brachionus manjavacas* makes a  
407 relatively large investment in each offspring, producing a maximum of 25 – 30 eggs over its  
408 lifespan, with each embryo approximately one-third the size of its mother. In comparison,  
409 hermaphroditic *C. elegans* produces up to 300 offspring of only 30 – 50  $\mu\text{m}$  in size over a  
410 shorter reproductive period, laying up to 140 eggs per day <sup>72,74</sup>. *Drosophila* lay up to 100 eggs  
411 per day with approximately 600 total offspring, and *Daphnia* produce nearly 100 offspring in  
412 multiple synchronized batches that are coordinated with adult molting <sup>73,84,85</sup>. Additionally, these

413 other invertebrates are indirect developers, producing offspring with larval stages or that  
414 undergo multiple metamorphoses before becoming reproductively mature; *B. manjavacas*, in  
415 contrast, has direct development, with neonates emerging from the egg as a small version of the  
416 adult form.

417

418 The early, high-investment, and direct reproductive strategy may be adaptive for *B. manjavacas*,  
419 although it is different from the r-selection strategy expected for a microscopic invertebrate that  
420 evolved in ephemeral habitats where it was subject to high extrinsic mortality due to predation  
421 and rapidly changing environmental conditions<sup>86</sup>. A larger investment in each embryo increases  
422 chances of neonate survival, but high external mortality likely decreases the selection pressure  
423 to produce high-quality offspring at late maternal ages<sup>63</sup>. Differences in life history strategy,  
424 even among short-lived invertebrate models evolving under similar environmental and predation  
425 selective pressures, must be considered when determining the applicability of results among  
426 species and from model organisms to humans.

427

### 428 **Offspring fitness is not determined by simple changes in gross maternal resource** 429 **allocation**

430 This study suggests that offspring size is not a sufficient measure to determine the quality or  
431 quantity of maternal investment in reproduction. Despite larger egg size and neonate body size  
432<sup>76</sup>, we did not observe the accelerated development time or greater early-life reproductive output  
433 that has been associated with earlier onset of senescence in *Daphnia* old-mother offspring<sup>40</sup>.  
434 Lipid reserves and starvation resistance were slightly lower in old-mother offspring, suggesting  
435 decreased offspring provisioning, though likely not enough to account for the 21% reduction in  
436 lifespan and 46% decline in reproduction between the youngest mother and oldest mother  
437 offspring. The relatively synchronous time to death in maternal age cohorts under starvation

438 conditions suggests that maternal provisioning to offspring is relatively consistent among  
439 offspring for a given maternal age cohort, but may decrease slightly with increasing maternal  
440 age. Lifespan extension under CCR and IF demonstrates that lifespan is plastic for all maternal  
441 age F1 cohorts, and is not solely determined by maternal provisioning. Taken together, these  
442 findings suggest that epigenetic or cellular mechanisms beyond simple changes in gross  
443 maternal investment play a role in decreased offspring fitness with increasing maternal age.

444

### 445 **Maternal age alters offspring response to caloric restriction**

446 The maternal age of the experimental cohort changes the magnitude of lifespan extension and  
447 degree of reproductive trade-off in response to caloric restriction, and may thus change  
448 interpretation of the mechanism. Lifespan extension under caloric restriction was greater for the  
449 offspring of the oldest mothers; under IF relative to AL, less trade-off between lifespan and  
450 reproduction was observed for F1<sub>9</sub> (no reduction in mean lifetime reproduction for a 28%  
451 increase in lifespan) than for F1<sub>3</sub> (35% reduced net reproduction and 21% lifespan increase). A  
452 previous study in *B. manjavacas* similarly showed that old-mother offspring had greater lifespan  
453 extension when their mothers were calorically restricted<sup>76</sup>. While the rate of aging decreased  
454 under caloric restriction in young mother offspring, only the onset of aging and not the aging rate  
455 were altered in old mother offspring. These results suggest that the offspring of the youngest  
456 mothers may already be closer to potential maximum lifespan, or alternatively, are less able to  
457 up-regulate caloric restriction-induced protective pathways. Given that F0 survivorship was 67%  
458 at 9 d old, we cannot rule out that a change in phenotypic composition of the population due to  
459 mortality led to the observed changes in offspring lifespan, fecundity, and caloric restriction  
460 response. However, as the tested rotifer population was isogenic and no other external  
461 environmental variables changed over the course of the experiment, the observed differences in  
462 both magnitude and mechanism of the response to caloric restriction are likely due to maternal

463 age. Increasing maternal age leads to changes in offspring gene expression in *C. elegans*,  
464 which likely cause differential offspring responses to environmental conditions<sup>83</sup>. The maternal  
465 age of experimental cohorts is not always controlled or consistent among separate aging studies  
466 and thus maternal age effects may be a source of the observed variability and inconsistencies  
467 seen among caloric restriction experiments.

468

### 469 **Caloric restriction increases relative fitness only in late life**

470 To assess the effects of maternal age and to evaluate the Disposable Soma theory and the  
471 evolutionary theory of the response to caloric restriction, many studies focus on end-point  
472 assessments such as median and maximum lifespan and on trade-offs between longevity and  
473 lifetime reproduction<sup>29,87-90</sup>. In reality, evolutionary fitness is an age-specific combination of  
474 innate lifespan, resistance to external mortality, and reproduction. Relative  $l_x m_x$  provides an age-  
475 specific measure of relative fitness that incorporates age-specific survivorship, fecundity, latency  
476 to reproduction, and timing of reproductive senescence.

477

478 Averaged over lifetime, the shift to lower daily reproduction and extended lifespan under CCR  
479 and IF appears maladaptive relative to the reproductive strategy under AL; the integrated  
480 relative lifetime  $l_x m_x$  is negative for CCR and IF. CCR and IF both provide an age-specific late  
481 life benefit, however, supporting the Disposable Soma theory for the evolution of lifespan  
482 extension in response to caloric restriction. It is hypothesized that those individuals that are able  
483 to reallocate resources from reproduction to maintenance of the soma during times of famine  
484 have a selective advantage; this strategy allows the organism to make it through the period of  
485 starvation, and produce offspring later when resources become available<sup>55,59</sup>. In the current  
486 study, the relationship between lifespan and lifetime reproduction was positive within each  
487 population, showing that longer-lived individuals tended to reproduce more. When food was

488 limited by CCR or IF, however, the slope of the lifespan-reproduction correlation decreased,  
489 suggesting a trade-off between extending lifespan and producing offspring when resources are  
490 limited, as is the expectation under the Disposable Soma theory<sup>55</sup>.

491

492 The caloric restriction-mediated late-life relative  $l_x m_x$  benefit greatly declines for F1s with  
493 increasing maternal age. Given that offspring of older mothers had a proportionally greater  
494 increase in lifespan, this does not indicate a decreased selective pressure for an adaptive  
495 response to caloric restriction. Rather, it suggests that the overall decreased lifespan and  
496 fecundity in old-mother offspring negates any fitness benefit of the caloric restriction response.  
497 While the early life cost of caloric restriction appears to decline with increasing maternal age,  
498 this is due primarily to the decrease in  $l_x m_x$  under AL conditions throughout life with increasing  
499 maternal age. The decline in relative offspring fitness with increasing maternal age supports the  
500 hypothesis that the force of natural selection decreases with increasing age<sup>63,91,92</sup>.

501

502 The increase in lifespan with concomitant decrease in daily reproduction is not in itself an  
503 adaptive response that increases fitness. Indeed, fitness will only be increased if reproduction is  
504 upregulated once food is restored. The ability to re-establish reproduction in late life after early  
505 life caloric restriction should be tested in the context of maternal age. Given the low rates of  
506 reproduction in old-mother offspring even under full food conditions, it is unclear that there is an  
507 evolutionary benefit to increasing lifespan in the face of limiting food resources for old-mother  
508 offspring, rather than maximizing early reproduction.

509

## 510 **CONCLUSIONS**

511 Because the selection gradient on both mortality and fecundity are decreasing with increasing  
512 age, changes in these parameters that affect older age classes are theorized to have less

513 impact than the same changes at earlier ages<sup>63,92-94</sup>. This study provides empirical support for  
514 this hypothesis, and demonstrates that maternal age affects not only offspring fitness, but also  
515 offspring response to interventions. We observed changing levels of caloric restriction-mediated  
516 lifespan extension and reproductive trade-off in different maternal age offspring. Additional work  
517 is needed to determine if maternal age has a similar impact on other lifestyle, diet, or  
518 pharmaceutical interventions, or if there are differences in maternal age effects among varied  
519 genotypes. Controlling for maternal age in experimental populations will be important for  
520 replication of experimental results, appropriate interpretation of findings, and assignment of  
521 mechanism.

522

523



524

525

526 **Authors' contributions**

527 K.E.G. designed and supervised the experiments, interpreted the data, and wrote the  
528 manuscript. M.J.B., G.J., E.C., and E.S conducted the experiments and edited the manuscript.

529

530 **Competing interests**

531 We have no competing financial or non-financial interests.

532

533 **Data availability**

534 Upon publication, data will be included in online supplementary material.

535

536 **Funding**

537 This study was supported by grant 5K01AG049049 from the National Institute on Aging to K.E.G  
538 and an Owens Family Foundation grant to K.E.G.

539

540 **Acknowledgements**

541 We thank Michael Neubert, Hal Caswell, Christina Hernandez, and Silke vanDaalen for  
542 discussions and constructive comments on the manuscript. We appreciate suggestions from  
543 anonymous reviewers that improved the manuscript.

544

545 **REFERENCES**

- 546 1 Gilbert, J. J. *Asplancha* and posterolateral spine induction in *Brachionus calyciflorus*.  
547 *Arch. Hydrobiol.* **64**, 1-62 (1967).
- 548 2 Gilbert, J. J. in *The ecology and evolution of inducible defenses* (eds Ralph Tollrian & C.  
549 Drew Harvell) 127-141 (Princeton University Press, 1999).

- 550 3 Gilbert, J. J. & Stemberger, R. S. *Asplanchna*-induced polymorphism in the rotifer  
551 *Keratella slacki*. *Limnology and Oceanography* **29**, 1309-1316 (1984).
- 552 4 Havel, J. E. & Dodson, S. I. *Chaoborus* predation on typical and spined morphs of  
553 *Daphnia pulex*: Behavioral observations. *Limnology and Oceanography* **29**, 487-494  
554 (1984).
- 555 5 Krueger, D. A. & Dodson, S. I. Embryological induction and predation ecology in *Daphnia*  
556 *pulex*. *Limnology and Oceanography* **26**, 219-223 (1981).
- 557 6 Parejko, K. & Dodson, S. I. The evolutionary ecology of an antipredator reaction norm:  
558 *Daphnia pulex* and *Chaoborus americanus*. *Evolution* **45**, 1665-1674 (1991).
- 559 7 Galloway, L. F. Maternal effects provide phenotypic adaptation to local environmental  
560 conditions. *New Phytologist* **166**, 93-100, doi:10.1111/j.1469-8137.2004.01314.x (2005).
- 561 8 Galloway, L. F. & Etterson, J. R. Transgenerational plasticity is adaptive in the wild.  
562 *Science* **318**, 1134-1136, doi:10.1126/science.1148766 (2007).
- 563 9 Barker, D. J. P. The fetal and infant origins of adult disease. *BMJ* **301**, 1111,  
564 doi:10.1136/bmj.301.6761.1111 (1990).
- 565 10 Barker, D. J. P. Maternal nutrition, fetal nutrition, and disease in later life. *Nutrition* **13**,  
566 807-813 (1997).
- 567 11 Hales, C. N. & Barker, D. J. P. The thrifty phenotype hypothesis. (2001).
- 568 12 Gilbert, J. J. & Waage, J. K. *Asplanchna*, *Asplanchna*-substance, and postereolateral  
569 spine length variation of the rotifer *Brachionus calyciflorus* in a natural environment.  
570 *Ecology* **48**, 1027-1031 (1967).
- 571 13 Rasmussen, C., Andrew, G., Zwaigenbaum, L. & Tough, S. Neurobehavioural outcomes  
572 of children with fetal alcohol spectrum disorders: A Canadian perspective. *Paediatric*  
573 *Child Health* **13**, 185-191 (2008).
- 574 14 Riley, E. P., Infante, M. A. & Warren, K. R. Fetal alcohol spectrum disorders: an overview.  
575 *Neuropsychol Rev* **21**, 73-80, doi:10.1007/s11065-011-9166-x (2011).
- 576 15 Hackshaw, A., Rodeck, C. & Boniface, S. Maternal smoking in pregnancy and birth  
577 defects: a systematic review based on 173 687 malformed cases and 11.7 million  
578 controls. *Hum Reprod Update* **17**, 589-604, doi:10.1093/humupd/dmr022 (2011).
- 579 16 Greer, E. L. *et al.* Transgenerational epigenetic inheritance of longevity in *Caenorhabditis*  
580 *elegans*. *Nature* **479**, 365-371, doi:10.1038/nature10572 (2011).

- 581 17 Sales, V. M., Ferguson-Smith, A. C. & Patti, M. E. Epigenetic Mechanisms of  
582 Transmission of Metabolic Disease across Generations. *Cell Metab* **25**, 559-571,  
583 doi:10.1016/j.cmet.2017.02.016 (2017).
- 584 18 Vaiserman, A. M., Koliada, A. K. & Jirtle, R. L. Non-genomic transmission of longevity  
585 between generations: potential mechanisms and evidence across species. *Epigenetics*  
586 *Chromatin* **10**, 38, doi:10.1186/s13072-017-0145-1 (2017).
- 587 19 Cao-Lei, L. *et al.* DNA Methylation Signatures Triggered by Prenatal Maternal Stress  
588 Exposure to a Natural Disaster: Project Ice Storm. *PLoS ONE* **9**, e107653.,  
589 doi:10.1371/journal.pone.0107653 (2014).
- 590 20 Adrian-Kalchhauser, I., Walser, J. C., Schwaiger, M. & Burkhardt-Holm, P. RNA  
591 sequencing of early round goby embryos reveals that maternal experiences can shape  
592 the maternal RNA contribution in a wild vertebrate. *BMC Evol Biol* **18**, 34,  
593 doi:10.1186/s12862-018-1132-2 (2018).
- 594 21 Brakefield, P. M. *et al.* What are the effects of maternal and pre-adult environments on  
595 ageing in humans, and are there lessons from adult models? *Mechanisms of Ageing and*  
596 *Development* **126**, 431-438, doi:10.1016/j.mad.2004.07.013 (2005).
- 597 22 Lansing, A. I. Increase of cortical calcium with age in the cells of a rotifer, *Euchlanis*  
598 *dilatata*, a planarian, *Phagocata* sp., and the toad, *Bufo fowleri*, as shown by the  
599 microincineration technique. *Biological Bulletin* **82**, 392-400 (1942).
- 600 23 Lansing, A. I. A transmissible, cumulative and reversible factor in aging. *Journal of*  
601 *Gerontology* **2**, 228-239 (1947).
- 602 24 Jennings, H. S. & Lynch, R. S. Age, mortality, fertility, and individual diversities in the  
603 rotifer *Proales sordida* Gosse. I. Effect of age of the parent on characteristics of the  
604 offspring. *Journal of Experimental Zoology* **50**, 345-407, doi:10.1002/jez.1400500303  
605 (1928).
- 606 25 Bell, A. G. *The duration of life and conditions associated with longevity: Study of the*  
607 *Hyde geneology*. (Genealogical Record Office, 1918).
- 608 26 Benton, T. G., St Clair, J. J. & Plaistow, S. J. Maternal effects mediated by maternal age:  
609 from life histories to population dynamics. *J Anim Ecol* **77**, 1038-1046,  
610 doi:10.1111/j.1365-2656.2008.01434.x (2008).
- 611 27 de la Fuente-Fernandez, R. Maternal effect on Parkinson's disease. *Annals of neurology*  
612 **48**, 782-787 (2000).

- 613 28 Lints, F. A. & Hoste, C. The Lansing effect revisited—I. Life-span. *Experimental*  
614 *Gerontology* **9**, 51-69, doi:10.1016/0531-5565(74)90008-4 (1974).
- 615 29 Priest, N. K., Mackowiak, B. & Promislow, D. E. The role of parental age effects on the  
616 evolution of aging. *Evolution* **56**, 927-935 (2002).
- 617 30 Rocca, W. A. *et al.* Maternal age and Alzheimer's Disease: A collaborative re-analysis of  
618 case-control studies. *International Journal of Epidemiology* **20**, S21-S27 (1992).
- 619 31 Tarin, J. J. *et al.* Delayed motherhood decreases life expectancy of mouse offspring. *Biol*  
620 *Reprod* **72**, 1336-1343, doi:10.1095/biolreprod.104.038919 (2005).
- 621 32 Velazquez, M. A., Smith, C. G., Smyth, N. R., Osmond, C. & Fleming, T. P. Advanced  
622 maternal age causes adverse programming of mouse blastocysts leading to altered  
623 growth and impaired cardiometabolic health in post-natal life. *Hum Reprod* **31**, 1970-1980,  
624 doi:10.1093/humrep/dew177 (2016).
- 625 33 Lansing, A. I. A nongenetic factor in the longevity of rotifers. *Annals of the New York*  
626 *Academy of Sciences* **57**, 455-464 (1954).
- 627 34 Lints, F. A. & Hoste, C. The Lansing Effect revisited. II.-Cumulative and spontaneously  
628 reversible parental age effects on fecundity in *Drosophila melanogaster*. *Evolution* **31**,  
629 387-404 (1977).
- 630 35 Bouwhuis, S., Vedder, O. & Becker, P. H. Sex-specific pathways of parental age effects  
631 on offspring lifetime reproductive success in a long-lived seabird. *Evolution* **69**, 1760-  
632 1771, doi:10.1111/evo.12692 (2015).
- 633 36 Schroeder, J., Nakagawa, S., Rees, M., Mannarelli, M. E. & Burke, T. Reduced fitness in  
634 progeny from old parents in a natural population. *Proc Natl Acad Sci U S A* **112**, 4021-  
635 4025, doi:10.1073/pnas.1422715112 (2015).
- 636 37 Boersma, B. & Maarten Wit, J. Catch-up Growth. *Endocrine Reviews* **18**, 646-661 (1997).
- 637 38 Marshall, D. J., Heppell, S. S., Munch, S. B. & Warner, R. R. The relationship between  
638 maternal phenotype and offspring quality: Do old mothers really produce the best  
639 offspring? *Ecology* **91**, 2862-2873 (2010).
- 640 39 Metcalfe, N. B. & Monaghan, P. Compensation for a bad start: grow now, pay later?  
641 *Trends in Ecology and Evolution* **16**, 254-260 (2001).
- 642 40 Plaistow, S. J., Shirley, C., Collin, H., Cornell, S. J. & Harney, E. D. Offspring  
643 Provisioning Explains Clone-Specific Maternal Age Effects on Life History and Life Span  
644 in the Water Flea, *Daphnia pulex*. *Am Nat* **186**, 376-389, doi:10.1086/682277 (2015).

- 645 41 Reid, J. M., Bignal, E. M., Bignal, S., McCracken, D. I. & Mohaghan, P. Environmental  
646 variability, life-history covariation and cohort effects in the red-billed chough *Pyrrhocorax*  
647 *pyrrhocorax*. *Journal of Animal Ecology* **72**, 36-46 (2003).
- 648 42 Kindsvater, H. K. & Otto, S. P. The evolution of offspring size across life-history stages.  
649 *Am Nat* **184**, 543-555, doi:10.1086/678248 (2014).
- 650 43 Fox, C. W. & Czesak, M. E. Evolutionary ecology of progeny size in arthropods. *Annual*  
651 *Review of Entomology* **45**, 341-369 (2000).
- 652 44 Berghanel, A., Heistermann, M., Schulke, O. & Ostner, J. Prenatal stress accelerates  
653 offspring growth to compensate for reduced maternal investment across mammals. *Proc*  
654 *Natl Acad Sci U S A*, doi:10.1073/pnas.1707152114 (2017).
- 655 45 Barclay, K. & Myrskylä, M. Maternal age and offspring health and health behaviours in  
656 late adolescence in Sweden. *SSM Popul Health* **2**, 68-76,  
657 doi:10.1016/j.ssmph.2016.02.012 (2016).
- 658 46 Farrer, L., Cupples, A., Kiely, D. K., Conneally, P. M. & Myers, R. H. Inverse relationship  
659 between age at onset of Huntington Disease and paternal age suggests involvement of  
660 genetic imprinting. *American Journal of Human Genetics* **50**, 528-535 (1992).
- 661 47 Barclay, K. & Myrskylä. Advanced Maternal Age and Offspring Outcomes: Reproductive  
662 Aging and Counterbalancing Period Trends. *Population and Development Review* (2016).
- 663 48 Barclay, K. & Myrskylä, M. Parental age and offspring mortality: Negative effects of  
664 reproductive ageing are outweighed by secular increases in longevity. (2016).
- 665 49 Carlslake, D., Tynelius, P., van den Berg, G., Davey Smith, G. & Rasmussen, F.  
666 Associations of parental age with health and social factors in adult offspring.  
667 Methodological pitfalls and possibilities. *Sci Rep* **7**, 45278, doi:10.1038/srep45278 (2017).
- 668 50 Gribble, K. E., Kaido, O., Jarvis, G. & Mark Welch, D. B. Patterns of intraspecific  
669 variability in the response to caloric restriction. *Experimental Gerontology* **51**, 28-37  
670 (2014).
- 671 51 Lucanic, M. *et al.* Impact of genetic background and experimental reproducibility on  
672 identifying chemical compounds with robust longevity effects. *Nature Communications* **8**,  
673 14256, doi:10.1038/ncomms14256 (2017).
- 674 52 Harper, J. M., Leathers, C. W. & Austad, S. N. Does caloric restriction extend life in wild  
675 mice? *Aging Cell* **5**, 441-449, doi:10.1111/j.1474-9726.2006.00236.x (2006).

- 676 53 Liao, C.-Y., Rikke, B. A., Johnson, T. E., Diaz, V. & Nelson, J. F. Genetic variation in the  
677 murine lifespan response to dietary restriction: from life extension to life shortening. *Aging*  
678 *Cell* **9**, 92-95, doi:10.1111/j.1474-9726.2009.00533.x (2010).
- 679 54 Helfand, S. L., Bauer, J. H. & Wood, J. G. in *Molecular Biology of Aging* (eds Leonard P.  
680 Guarente, Linda Partridge, & Douglas C. Wallace) 73-93 (Cold Spring Harbor Laboratory  
681 Press, 2008).
- 682 55 Kirkwood, T. B. L. & Shanley, D. P. Food restriction, evolution and aging. *Mechanisms of*  
683 *Aging and Development* **126**, 1011-1016, doi:10.1016/j.mad.2005.03.021 (2005).
- 684 56 Mair, W. & Dillin, A. Aging and Survival: The genetics of life span extension by dietary  
685 restriction. *Annual Reviews of Biochemistry* **77**, 727-754 (2008).
- 686 57 Sutphin, G. L. & Kaeberlein, M. Dietary restriction by bacterial deprivation increases life  
687 span in wild-derived nematodes. *Experimental Gerontology* **43**, 130-135,  
688 doi:10.1016/j.exger.2007.10.019 (2008).
- 689 58 Mattison, J. A. *et al.* Caloric restriction improves health and survival of rhesus monkeys.  
690 *Nat Commun* **8**, 14063, doi:10.1038/ncomms14063 (2017).
- 691 59 Kirkwood, T. B. L. Evolution of aging. *Nature* **270**, 301-304 (1977).
- 692 60 Kirkwood, T. B. L. Evolution of ageing. *Mechanisms of Aging and Development* **123**, 737-  
693 745 (2002).
- 694 61 Shanley, D. P. & Kirkwood, T. B. L. Calorie restriction and aging: a life-history analysis.  
695 *Evolution* **54**, 740-750 (2000).
- 696 62 Stearns, S. C. Trade-offs in life-history evolution. *Functional Ecology* **3**, 259-268 (1989).
- 697 63 Medawar, P. B. *An Unsolved Problem in Biology*. (H.K. Lewis and Co., 1952).
- 698 64 Kirkwood, T. B. L. & Austad, S. N. Why do we age? *Nature* **408**, 233-238 (2000).
- 699 65 Kirkwood, T. B. L. & Melov, S. On the programmed/non-programmed nature of ageing  
700 within the life history. *Current Biology* **21**, R701-R707, doi:10.1016/j.cub.2011.07.020  
701 (2011).
- 702 66 van den Heuvel, J., English, S. & Uller, T. Disposable Soma Theory and the Evolution of  
703 Maternal Effects on Ageing. *PLoS One* **11**, e0145544, doi:10.1371/journal.pone.0145544  
704 (2016).
- 705 67 Lind, M. I., Berg, E. C., Alavioon, G., Maklakov, A. A. & Blanckenhorn, W. Evolution of  
706 differential maternal age effects on male and female offspring development and longevity.  
707 *Functional Ecology* **29**, 104-110, doi:10.1111/1365-2435.12308 (2015).

- 708 68 Moorad, J. A. & Nussey, D. H. Evolution of maternal effect senescence. *Proc Natl Acad*  
709 *Sci U S A* **113**, 362-367, doi:10.1073/pnas.1520494113 (2016).
- 710 69 Gribble, K. E. & Snell, T. W. in *Conn's Handbook of Models for Human Aging* (eds  
711 Jeffrey L Ram & P. Michael Conn) Ch. 36, 483-495 (Academic Press, 2018).
- 712 70 Austad, S. N. Is there a role for new invertebrate models for aging research? *Journal of*  
713 *Gerontology* **64A**, 192-194, doi:doi:10.1093/gerona/gln059 (2009).
- 714 71 Ebert, D. *Ecology, Epidemiology, and Evolution of Parasitism in Daphnia*. (National  
715 Library of Medicine (US), National Center for Biotechnology Information, 2005).
- 716 72 Hodgkin, J. & Barnes, T. M. More is not better: brood size and population growth in a  
717 self-fertilizing nematode. *Proceedings of the Royal Society of London B. Biological*  
718 *Sciences* **246**, 19-24 (1991).
- 719 73 Clutton-Brock, T. *Reproductive success: Studies of individual variation in contrasting*  
720 *breeding systems*. 548 (The University of Chicago Press, 1988).
- 721 74 Muschiol, D., Schroeder, F. & Traunspurger, W. Life cycle and population growth rate of  
722 *Caenorhabditis elegans* studied by a new method. *BMC Ecol* **9**, 14, doi:10.1186/1472-  
723 6785-9-14 (2009).
- 724 75 MacArthur, R. H. & Wilson, E. O. *The Theory of Island Biogeography*. 2nd, 2001 edn,  
725 (Princeton University Press, 1967).
- 726 76 Gribble, K. E., Jarvis, G., Bock, M. J. & Mark Welch, D. B. Maternal caloric restriction  
727 partially rescues the deleterious effects of advanced maternal age on offspring. *Aging*  
728 *Cell* **13**, 623-630 (2014).
- 729 77 Guillard, R. R. L. in *Culture of Marine Invertebrates* (eds W.L. Smith & M.H. Chanley)  
730 (Plenum Publishing Corporation, 1975).
- 731 78 Gribble, K. E. & Mark Welch, D. B. Life-span extension by caloric restriction is determined  
732 by type and level of food reduction and by reproductive mode in *Brachionus manjavacas*  
733 (Rotifera). *Journals of Gerontology Series A: Biological Sciences* **68**, 349-358,  
734 doi:10.1093/gerona/gls170 (2013).
- 735 79 Faul, F., Erdfelder, E., Lang, A.-G. & Buchner, A. G\*Power 3: A flexible statistical power  
736 analysis program for the social, behavioral, and biomedical sciences. *Behavioral*  
737 *Research Methods* **39**, 175-191 (2007).
- 738 80 Schindelin, J. *et al.* Fiji: an open-source platform for biological-image analysis. *Nat*  
739 *Methods* **9**, 676-682, doi:10.1038/nmeth.2019 (2012).

- 740 81 Lansing, A. I. Evidence for aging as a consequence of growth cessation. *Proceedings of*  
741 *the National Academy of Sciences, USA* **34**, 304-310 (1948).
- 742 82 Murphy, J. S. & Davidoff, M. The result of improved nutrition on the Lansing Effect in  
743 *Moina macrocopa*. *Biological Bulletin* **142**, 302-309 (1972).
- 744 83 Perez, M. F., Francesconi, M., Hidalgo-Carcedo, C. & Lehner, B. Maternal age generates  
745 phenotypic variation in *Caenorhabditis elegans*. *Nature* **552**, 106-109,  
746 doi:10.1038/nature25012 (2017).
- 747 84 Porter, K. G., Orcutt, J. D. & Gerritsen, J. Functional Response and Fitness in a  
748 Generalist Filter Feeder, *Daphnia magna* (Cladocera:Crustacea). *Ecology* **64**, 735-742,  
749 doi:205.208.116.24 (1983).
- 750 85 Schindler, D. W. Feeding, Assimilation and Respiration Rates of *Daphnia magna* Under  
751 Various Environmental Conditions and their Relation to Production Estimates. *Journal of*  
752 *Animal Ecology* **37**, 369-385, doi:192.152.118.98 (1968).
- 753 86 Wallace, R. L. & Snell, T. W. in *Ecology and Classification of North American Freshwater*  
754 *Invertebrates* (eds James Thorp, H. & Alan P. Covich) 173-235 (Elsevier, 2009).
- 755 87 Moore, P. J. & Harris, W. E. Is a decline in offspring quality a necessary consequence of  
756 maternal age? *Proceedings. Biological sciences* **270 Suppl 2**, S192-194,  
757 doi:10.1098/rsbl.2003.0051 (2003).
- 758 88 Fox, C., W., Bush, M. L. & Wallin, W. G. Maternal age affects offspring lifespan of the  
759 seed beetle, *Callosobruchus maculatus*. *Functional Ecology* **17**, 811–820,  
760 doi:10.1111/j.1365-2435.2003.00799.x (2003).
- 761 89 Bloch Qazi, M. C. *et al.* Transgenerational effects of maternal and grandmaternal age on  
762 offspring viability and performance in *Drosophila melanogaster*. *J Insect Physiol* **100**, 43-  
763 52, doi:10.1016/j.jinsphys.2017.05.007 (2017).
- 764 90 Barks, P. M., Laird, R. A. & Anten, N. Senescence in duckweed: age-related declines in  
765 survival, reproduction and offspring quality. *Functional Ecology* **29**, 540-548,  
766 doi:10.1111/1365-2435.12359 (2015).
- 767 91 Gillespie, D. O., Trotter, M. V., Krishna-Kumar, S. & Tuljapurkar, S. D. Birth-order  
768 differences can drive natural selection on aging. *Evolution* **68**, 886-892,  
769 doi:10.1111/evo.12319 (2014).
- 770 92 Hamilton, W. D. The moulding of senescence by natural selection. *Journal of Theoretical*  
771 *Biology* **12**, 12-45, doi:10.1016/0022-5193(66)90184-6 (1966).



- 772 93 Wensink, M. J., Caswell, H. & Baudisch, A. The Rarity of Survival to Old Age Does Not  
773 Drive the Evolution of Senescence. *Evolutionary Biology* **44**, 5-10, doi:10.1007/s11692-  
774 016-9385-4 (2017).
- 775 94 Caswell, H. A general formula for the sensitivity of population growth rate to changes in  
776 life history parameters. *Theoretical Population Biology* **14**, 215-230, doi:10.1016/0040-  
777 5809(78)90025-4 (1978).
- 778
- 779
- 780
